# Supplementary material for: Remarkable flux effect of Li-codoping on highly enhanced luminescence of orthosilicate Ba2SiO4:Eu2+ phosphors for NUV-LEDs: autonomous impurity purification by eutectic Li2CO3 melts
Source: Royal Society of Chemistry journal article supplement (doi:10.1039/c5ra19712k), 2015-01-01
Supplement: c5ra19712k1.pdf [file c5ra19712k1.pdf]

## Supporting information

RSC Advances

**Remarkable Flux Effect of Li-Codoping on Highly Enhanced Luminescence of Orthosilicate Phosphors,  $\text{Ba}_2\text{SiO}_4:\text{Eu}^{2+}$  for NUV-LEDs: Autonomous Impurity Purification by Eutectic  $\text{Li}_2\text{CO}_3$  Melts**

**Donghyeon Kim,<sup>a</sup> Ki-Wan Jeon,<sup>c</sup> Jong Sung Jin,<sup>d</sup> Seong-Gu Kang,<sup>e</sup> Dong-Kyun Seo<sup>c</sup> and Jung-Chul Park<sup>\*ab</sup>**

<sup>a</sup> Graduate School of Advanced Engineering, Silla University, Busan 617-736, Republic of Korea.

<sup>b</sup> Center for Green Fusion Technology and Department of Engineering in Energy & Applied Chemistry, Silla University, Busan 617-736, Republic of Korea

<sup>c</sup> Department of Chemistry and Biochemistry, Arizona State University, Tempe, AZ 85287-1604, USA

<sup>d</sup> Busan Center, Korea Basic Science Institute, Busan 618-230, Republic of Korea

<sup>e</sup> Department of Chemical Engineering, Hoseo University, Asan-Si, Chungnam-Do, 336-795, Republic of Korea

**Corresponding: Jung-Chul Park**

**Center for Green Fusion Technology and Department of Engineering in Energy & Applied Chemistry, Silla University, Busan 617-736, Republic of Korea**

**Telephone: +82-51-999-5469**

**Fax number: +82-51-999-5652**

**E-mail: parkjc@silla.ac.kr**

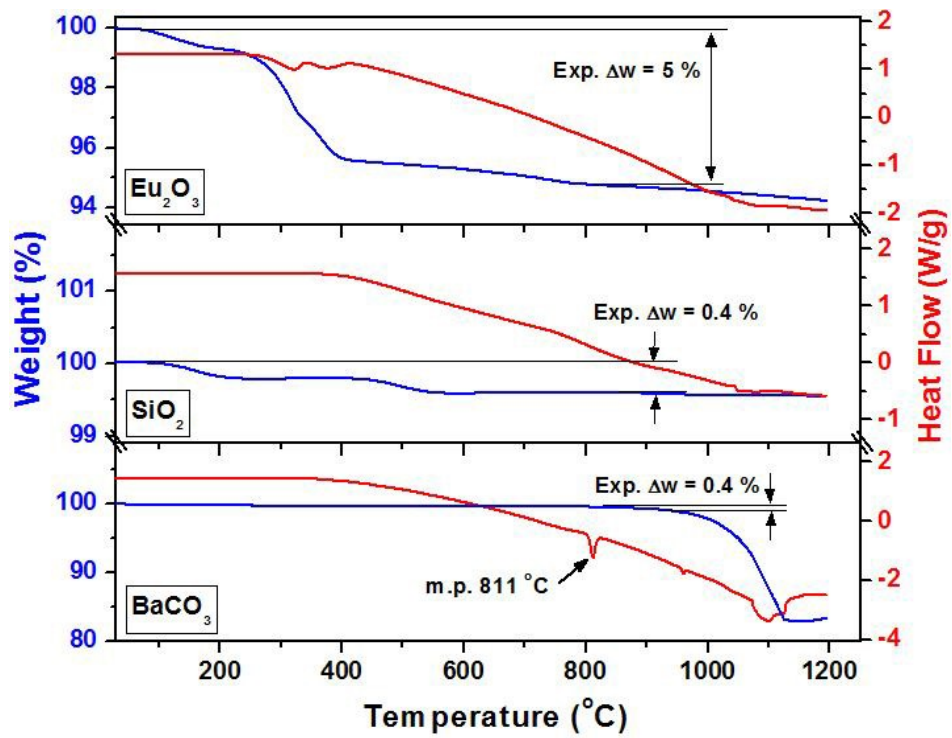

Figure S1. TG/DSC curves of  $\text{BaCO}_3$ ,  $\text{SiO}_2$ , and  $\text{Eu}_2\text{O}_3$  starting materials.

**Table S1. Trace Elements of SiO<sub>2</sub>-Starting Chemicals Determined by ICP-MS**

| element                           | SiO <sub>2</sub> (Aldrich, 99.995%)<br>(ppm) | SiO <sub>2</sub> (Aldrich, 99.6%)<br>(ppm) | SiO <sub>2</sub> (Aldrich, 99.6%) <sup>a</sup><br>(ppm) |
|-----------------------------------|----------------------------------------------|--------------------------------------------|---------------------------------------------------------|
| Al                                | 4.307                                        | 3891.49                                    | 2288.07                                                 |
| K                                 | 0.307                                        | 1312.78                                    | 186.48                                                  |
| Fe                                | 0.591                                        | 478.16                                     | 102.28                                                  |
| P                                 | 2.102                                        | 199.76                                     | 35.05                                                   |
| Ti                                | 1.917                                        | 193.88                                     | 174.14                                                  |
| Ca                                | 0.531                                        | 177.03                                     | 56.32                                                   |
| Sr                                | 0.045                                        | 162.48                                     | 35.16                                                   |
| Mg                                | 0.112                                        | 152.81                                     | 77.92                                                   |
| Zn                                | 0.978                                        | 118.60                                     | 228.38                                                  |
| Na                                | 1.416                                        | 75.76                                      | 34.72                                                   |
| S                                 | ND                                           | 28.21                                      | 11.24                                                   |
| B                                 | 0.732                                        | 25.61                                      | 36.30                                                   |
| Cu                                | 0.183                                        | 24.73                                      | 47.95                                                   |
| Ba                                | 0.000                                        | 22.93                                      | 4.63                                                    |
| Zr                                | 0.129                                        | 14.83                                      | 19.38                                                   |
| Mn                                | 0.022                                        | 10.08                                      | 7.59                                                    |
| V                                 | ND                                           | 5.13                                       | 2.34                                                    |
| Cr                                | 0.047                                        | 4.00                                       | 2.75                                                    |
| Pb                                | 0.010                                        | 3.64                                       | 1.13                                                    |
| Li                                | 0.302                                        | 2.51                                       | 4.77                                                    |
| Ga                                | 0.034                                        | 2.17                                       | 0.72                                                    |
| Co                                | 0.003                                        | 1.72                                       | 1.71                                                    |
| Nb                                | 0.018                                        | 1.45                                       | 2.46                                                    |
| Ni                                | 0.109                                        | 1.38                                       | 1.84                                                    |
| <b>Σ(As and 10 elements)</b>      | <b>0.753</b>                                 | <b>2.65</b>                                | <b>1.54</b>                                             |
| <b>SiO<sub>2</sub> purity (%)</b> | <b>99.998</b>                                | <b>99.310</b>                              | <b>99.664</b>                                           |

<sup>a</sup> SiO<sub>2</sub> (Aldrich, 99.6%) was treated with aqua regia
